# Supplementary material for: Prevalence of Ocular Chlamydia trachomatis Infection in Amhara Region, Ethiopia, after 8 Years of Trachoma Control Interventions
Source: PubMed Central journal article supplement (PMC9896333; doi:10.4269/ajtmh.22-0535), 2023-01-09
Supplement: tpmd220535.SD1.pdf [file tpmd220535.SD1.pdf]

Supplemental Table 1. District-level estimates of TF and TI among children ages 1 to 9 years and district-level estimates of ocular *Chlamydia trachomatis* (Ct) among children ages 1 to 5 years, by zone, district, year and survey type, Amhara, Ethiopia 2014-2021.

| <b>Zone</b> | <b>District</b>    | <b>Year</b> | <b>Survey Type</b> | <b>TF (1-9 y)</b> | <b>TI (1-9 y)</b> | <b>Ct (1-5 y)</b> |
|-------------|--------------------|-------------|--------------------|-------------------|-------------------|-------------------|
| Awi         | Ankesha            | 2016        | TIS                | 16.9              | 0.8               | 0.54              |
| Awi         | Banja              | 2018        | TIS                | 3.99              | 0.6               | 0                 |
| Awi         | Chagni Town        | 2016        | TIS                | 3.8               | 0.1               | 0.5               |
| Awi         | Dangila Town       | 2016        | TIS                | 1.2               | 0.4               | 0                 |
| Awi         | Dangila Zuria      | 2016        | TIS                | 3.6               | 0.8               | 0                 |
| Awi         | Fagita Lekoma      | 2016        | TIS                | 11.7              | 1.8               | 0                 |
| Awi         | Guagusa-Shikudad   | 2016        | TIS                | 28.3              | 2.8               | 0.54              |
| Awi         | Guangua            | 2016        | TIS                | 7                 | 1.2               | 0                 |
| Awi         | Injibara town      | 2015        | TSS                | 1.5               | 0.7               | 0                 |
| Awi         | Jawi               | 2016        | TIS                | 4.9               | 2                 | 0                 |
| Awi         | Zigem              | 2016        | TIS                | 16.4              | 5.5               | 0.53              |
| East Gojjam | Aneded             | 2018        | TIS                | 15.1              | 1.3               | 3.92              |
| East Gojjam | Awabel             | 2018        | TIS                | 11.33             | 0.5               | 2.06              |
| East Gojjam | Baso Liben         | 2018        | TIS                | 18.12             | 2.3               | 5.36              |
| East Gojjam | Bibugn             | 2016        | TIS                | 10.6              | 1                 | 0                 |
| East Gojjam | Debay Tilatgin     | 2016        | TIS                | 27.9              | 5.7               | 4.57              |
| East Gojjam | Debre Eliase       | 2018        | TIS                | 6.64              | 0.5               | 0                 |
| East Gojjam | Debre Markos Town  | 2016        | TIS                | 5                 | 0                 | 0                 |
| East Gojjam | Dejene             | 2018        | TIS                | 20.07             | 4.2               | 11.63             |
| East Gojjam | Enarge             | 2018        | TIS                | 16.98             | 2.5               | 1.47              |
| East Gojjam | Enebssie Sar Midir | 2018        | TIS                | 16.27             | 1                 | 0.24              |
| East Gojjam | Enemay             | 2018        | TIS                | 23.46             | 4                 | 3.49              |
| East Gojjam | Goncha             | 2016        | TIS                | 24                | 3                 | 6.08              |
| East Gojjam | Gozamin            | 2018        | TIS                | 5.3               | 0.2               | 0.86              |

|              |                    |      |     |       |      |       |
|--------------|--------------------|------|-----|-------|------|-------|
| East Gojjam  | Huletu Eju Enessie | 2018 | TIS | 13.42 | 0.8  | 0.82  |
| East Gojjam  | Machakel           | 2016 | TIS | 14.1  | 1.5  | 0     |
| East Gojjam  | Motta Town Admin.  | 2016 | TIS | 7.3   | 0.7  | 0     |
| East Gojjam  | Sedie              | 2018 | TIS | 4.06  | 0.4  | 0     |
| East Gojjam  | Shebel             | 2018 | TIS | 22.92 | 1.6  | 3.63  |
| East Gojjam  | Sinan              | 2016 | TIS | 3.9   | 0.3  | 1.16  |
| North Gondar | Aderkay            | 2017 | TIS | 3.63  | 0.5  | 0     |
| North Gondar | Alefa              | 2015 | TIS | 4.6   | 1.5  | 0     |
| North Gondar | Beyeda             | 2018 | TIS | 7.1   | 0.2  | 0     |
| North Gondar | Chilga             | 2015 | TSS | 3.1   | 0.8  | 0     |
| North Gondar | Dabat              | 2021 | TIS | 23.35 | 4    | 7.927 |
| North Gondar | Debark Town        | 2018 | TIS | 3.34  | 0.4  | 0     |
| North Gondar | Debark Zuria       | 2018 | TIS | 16.2  | 1.1  | 3.07  |
| North Gondar | Dembiya            | 2017 | TIS | 17.49 | 2    | 8     |
| North Gondar | East Belessa       | 2015 | TIS | 34.9  | 5.2  | 1.02  |
| North Gondar | Genda Wuha Town    | 2015 | TSS | 1.8   | 1.2  | 0     |
| North Gondar | Gondar Town        | 2017 | TIS | 5.7   | 0.3  | 0     |
| North Gondar | Gondar Zuria       | 2015 | TIS | 42.8  | 14.1 | 11.22 |
| North Gondar | Janamora           | 2021 | TIS | 18.89 | 2.2  | 2.6   |
| North Gondar | Lay Armachiho      | 2017 | TIS | 1.14  | 0.1  | 0     |
| North Gondar | Metema             | 2017 | TIS | 1     | 0.2  | 0     |
| North Gondar | Quara              | 2017 | TIS | 4.73  | 1.6  | 0     |
| North Gondar | Tach Armchiho      | 2015 | TSS | 3.2   | 1.2  | 0     |
| North Gondar | Takussa            | 2015 | TIS | 13.9  | 2.8  | 1.01  |
| North Gondar | Tegede             | 2017 | TSS | 2.48  | 0.3  | 0     |
| North Gondar | Telemt             | 2018 | TIS | 8.61  | 0.4  | 0     |
| North Gondar | West Armachiho     | 2017 | TIS | 7.5   | 2.8  | 0     |
| North Gondar | West Belessa       | 2019 | TIS | 34.9  | 3.9  | 8.24  |
| North Gondar | Wogera             | 2015 | TIS | 30    | 11.8 | 12.12 |
| North Shoa   | Angolelanatera     | 2016 | TIS | 9.9   | 3.9  | 0.5   |

|             |                   |      |     |       |     |       |
|-------------|-------------------|------|-----|-------|-----|-------|
| North Shoa  | Ankober           | 2018 | TIS | 3.62  | 0   | 0     |
| North Shoa  | Antsokia Gemza    | 2016 | TIS | 17.8  | 6.6 | 7.25  |
| North Shoa  | Asagirt           | 2017 | TIS | 6.2   | 1.4 | 3.33  |
| North Shoa  | Basona Worana     | 2016 | TIS | 7.8   | 1.5 | 5.16  |
| North Shoa  | Berehet           | 2017 | TSS | 3.2   | 0.5 | 1.23  |
| North Shoa  | Debre Birhan Town | 2016 | TIS | 10.6  | 3   | 0     |
| North Shoa  | Efrata Gidim      | 2018 | TIS | 8.46  | 0.6 | 6.25  |
| North Shoa  | Ensaro            | 2020 | TIS | 30.05 | 3.6 | 9.58  |
| North Shoa  | Gishe             | 2018 | TIS | 6.13  | 0.3 | 6.67  |
| North Shoa  | H/Mariam Kesem    | 2017 | TIS | 15.1  | 1   | 1.32  |
| North Shoa  | Kewot             | 2016 | TIS | 15.9  | 3   | 1.89  |
| North Shoa  | Menz-Gera         | 2016 | TIS | 8.7   | 1.6 | 0     |
| North Shoa  | Menz-Keya         | 2019 | TIS | 11.81 | 0.7 | 2.73  |
| North Shoa  | Menz-Lalo         | 2016 | TIS | 8     | 2.3 | 0     |
| North Shoa  | Menz-Mama         | 2016 | TIS | 7.9   | 2.5 | 0     |
| North Shoa  | Merhabete         | 2019 | TIS | 36.09 | 5.5 | 34.37 |
| North Shoa  | Mida Woremo       | 2019 | TIS | 29.44 | 4.1 | 16.52 |
| North Shoa  | Minjar Shenkora   | 2018 | TIS | 8.22  | 0.7 | 0     |
| North Shoa  | Mojana Wodera     | 2018 | TIS | 7.74  | 0.4 | 2.44  |
| North Shoa  | Moretna Jiru      | 2019 | TIS | 30.09 | 2.5 | 15.18 |
| North Shoa  | Shoarobit Town    | 2016 | TIS | 4.8   | 0.9 | 0     |
| North Shoa  | Siadebirnawayu    | 2017 | TIS | 17.4  | 2.2 | 0.62  |
| North Shoa  | Tarmaber          | 2016 | TIS | 33.9  | 5.3 | 9.09  |
| North Wollo | Angot             | 2018 | TIS | 0.8   | 0.3 | 0     |
| North Wollo | Ayinabugina       | 2018 | TIS | 42.74 | 4.9 | 27.5  |
| North Wollo | Dawunt            | 2018 | TIS | 39.02 | 6.7 | 16.96 |
| North Wollo | Gazo              | 2018 | TIS | 4.27  | 0.6 | 2.7   |
| North Wollo | Gidan             | 2018 | TIS | 14.41 | 0.7 | 0     |
| North Wollo | Gubalafto         | 2017 | TIS | 3     | 0   | 0     |
| North Wollo | Habiru            | 2017 | TIS | 5.4   | 0.6 | 1.55  |

|              |                    |      |     |       |     |       |
|--------------|--------------------|------|-----|-------|-----|-------|
| North Wollo  | Kobo Town Admin    | 2016 | TIS | 5     | 1.2 | 0     |
| North Wollo  | Kobo Zuria         | 2018 | TIS | 10.41 | 0.6 | 3.03  |
| North Wollo  | Lalibela Town      | 2018 | TIS | 14.18 | 1.9 | 3.49  |
| North Wollo  | Lasta              | 2018 | TIS | 24.47 | 1   | 5.94  |
| North Wollo  | Meket              | 2018 | TIS | 37    | 4.7 | 17.95 |
| North Wollo  | Wadilla            | 2018 | TIS | 22.66 | 1.4 | 7.27  |
| North Wollo  | Woldia             | 2017 | TIS | 1     | 0.3 | 0     |
| Oromia       | Artuma Furse       | 2018 | TIS | 11.87 | 1.3 | 1.67  |
| Oromia       | Bati Rural         | 2017 | TIS | 9.9   | 1.2 | 0     |
| Oromia       | Bati Town          | 2017 | TIS | 3.3   | 0.6 | 0     |
| Oromia       | Dawa Chafa         | 2018 | TIS | 17.44 | 2.1 | 3     |
| Oromia       | Dawey Harawa       | 2019 | TIS | 13.73 | 1   | 1.9   |
| Oromia       | Jille Tumuga       | 2018 | TIS | 9.03  | 0.8 | 0     |
| Oromia       | Kemmissie          | 2017 | TIS | 1.8   | 0   | 0.61  |
| South Gondar | Andabet/West Estie | 2017 | TIS | 36.96 | 6.2 | 11.32 |
| South Gondar | Debre Tabor town   | 2016 | TIS | 4.7   | 0.4 | 0     |
| South Gondar | Dera               | 2014 | TIS | 29.1  | 5   | 2.66  |
| South Gondar | East Estie         | 2015 | TIS | 20.7  | 3.7 | 3.41  |
| South Gondar | Ebinat             | 2014 | TIS | 49.5  | 9.5 | 10.3  |
| South Gondar | Farta              | 2015 | TIS | 32.6  | 6.7 | 26.09 |
| South Gondar | Fogera             | 2014 | TIS | 35.6  | 4.9 | 3.32  |
| South Gondar | Lay Gaynt          | 2015 | TIS | 47.8  | 9.6 | 3.26  |
| South Gondar | Libo Kemkem        | 2014 | TIS | 35.8  | 7.3 | 1.47  |
| South Gondar | Simada             | 2015 | TIS | 45.7  | 8.4 | 5.68  |
| South Gondar | Tach Gaynt         | 2014 | TIS | 35.8  | 7.4 | 6.43  |
| South Gondar | Woreta town        | 2015 | TIS | 5.7   | 0.4 | 1.47  |
| South Wollo  | Albuko             | 2017 | TIS | 8.9   | 0   | 0.77  |
| South Wollo  | Ambassel           | 2017 | TIS | 2     | 0.6 | 1.8   |
| South Wollo  | Argoba             | 2020 | TIS | 41.56 | 6.6 | 16.78 |
| South Wollo  | Borena/Debresinna  | 2017 | TIS | 13.1  | 2.6 | 0     |

|             |                    |      |     |       |      |       |
|-------------|--------------------|------|-----|-------|------|-------|
| South Wollo | Delanta            | 2016 | TIS | 38.6  | 12.7 | 22.08 |
| South Wollo | Dessie Ketema      | 2017 | TIS | 1.9   | 0.6  | 0     |
| South Wollo | Dessie Zuria       | 2018 | TIS | 5.79  | 0.4  | 0     |
| South Wollo | Jamma              | 2019 | TIS | 16.7  | 1    | 6.7   |
| South Wollo | Kalala             | 2019 | TIS | 24.57 | 1.7  | 6.44  |
| South Wollo | Kalu               | 2018 | TIS | 9.23  | 0.5  | 0     |
| South Wollo | Kombolcha          | 2018 | TIS | 2.81  | 0.5  | 0     |
| South Wollo | Kutaber            | 2017 | TIS | 14.9  | 1.8  | 7.75  |
| South Wollo | Legambo            | 2017 | TIS | 10.2  | 2.4  | 0     |
| South Wollo | Legehida           | 2017 | TIS | 33.7  | 4.5  | 6.08  |
| South Wollo | Mehal Sayient      | 2019 | TIS | 9.49  | 0.4  | 0     |
| South Wollo | Mekidella          | 2019 | TIS | 23.48 | 0.6  | 11.76 |
| South Wollo | Sayient            | 2017 | TIS | 17.1  | 1.3  | 0.67  |
| South Wollo | Tehuledere         | 2017 | TIS | 2.7   | 0.1  | 0     |
| South Wollo | Tenta              | 2017 | TIS | 20.1  | 1.9  | 2.96  |
| South Wollo | Wogide             | 2019 | TIS | 25.6  | 1.4  | 8.88  |
| South Wollo | Worebabo           | 2020 | TIS | 23.88 | 2.5  | 11.48 |
| South Wollo | Woreilu            | 2017 | TIS | 18.9  | 4.1  | 7.38  |
| Waghemra    | Abergelle          | 2017 | TIS | 19.6  | 3.8  | 2.13  |
| Waghemra    | Dahanna            | 2017 | TIS | 55.3  | 13.7 | 19.34 |
| Waghemra    | Gazegibilla        | 2019 | TIS | 31.53 | 1.1  | 12.84 |
| Waghemra    | Sahalla Seyemt     | 2016 | TIS | 13.3  | 1.7  | 0     |
| Waghemra    | Sekota Ketema      | 2019 | TIS | 14.76 | 2.1  | 3.05  |
| Waghemra    | Sekota Zuria       | 2019 | TIS | 32.39 | 2.2  | 11.51 |
| Waghemra    | Tsagebji           | 2019 | TIS | 47.98 | 3.5  | 23.6  |
| Waghemra    | Ziqualla           | 2017 | TIS | 16.5  | 2    | 0     |
| West Gojjam | Bahir Dar city     | 2016 | TIS | 12.3  | 3.4  | 0.5   |
| West Gojjam | Bahir Dar Zuria    | 2016 | TIS | 23.9  | 4    | 0     |
| West Gojjam | Bure Town (Ketema) | 2016 | TIS | 32.3  | 3.4  | 2.11  |
| West Gojjam | Bure Zuria         | 2016 | TIS | 31.9  | 10   | 12.28 |

|             |                  |      |     |      |     |      |
|-------------|------------------|------|-----|------|-----|------|
| West Gojjam | Dega Damot       | 2016 | TIS | 2    | 0.3 | 0    |
| West Gojjam | Dembecha         | 2016 | TIS | 15   | 8.3 | 1.6  |
| West Gojjam | Finot Selam town | 2015 | TSS | 4.8  | 0.9 | 1.42 |
| West Gojjam | Gonje Kollala    | 2015 | TIS | 32.1 | 5.1 | 2.47 |
| West Gojjam | Jabi Tinan       | 2015 | TIS | 15.5 | 1.8 | 0    |
| West Gojjam | Mecha            | 2016 | TIS | 5.1  | 0.4 | 0    |
| West Gojjam | North Achefer    | 2016 | TIS | 18.8 | 1.4 | 0    |
| West Gojjam | Quarit           | 2015 | TIS | 13.4 | 2.9 | 0    |
| West Gojjam | Sekella          | 2016 | TIS | 9.6  | 1.6 | 0    |
| West Gojjam | South Achefer    | 2015 | TIS | 6.7  | 0.8 | 0    |
| West Gojjam | Wonberma         | 2016 | TIS | 32.8 | 4.8 | 8.51 |
| West Gojjam | Yilmana Densa    | 2016 | TIS | 10.8 | 2.1 | 0    |
